# Supplementary material
Source: PubMed Central journal article supplement (PMC10463168)
Supplement: jamainternmed-e232873-s001.pdf [file jamainternmed-e232873-s001.pdf]

## **Data Sharing Statement**

Paralkar. Career Plans of Internal Medicine Residents From 2019 to 2021. *JAMA Intern Med.*  
Published August 28, 2023. doi:10.1001/jamainternmed.2023.2873

### **Data**

**Data available:** No
